# Supplementary material for: Controlled production of patchy particles from the combined effects of nanoprecipitation and vitrification
Source: Royal Society of Chemistry journal article supplement (doi:10.1039/c7sm01896g), 2017-01-01
Supplement: c7sm01896g1.pdf [file c7sm01896g1.pdf]

# Electronic Supplementary Information

## Controlled production of patchy particles from the combined effects of nanoprecipitation and vitrification

Nannan Li,<sup>†</sup> Arash Nikoubashman,<sup>\*,‡</sup> and Athanassios Z. Panagiotopoulos<sup>\*,†</sup>

<sup>†</sup>*Department of Chemical and Biological Engineering, Princeton University, Princeton, New Jersey 08544, USA*

<sup>‡</sup>*Institute of Physics, Johannes Gutenberg University Mainz, Staudingerweg 7, 55128 Mainz, Germany*

E-mail: anikouba@uni-mainz.de; azp@princeton.edu

### Glass transition temperature calculations for polymers A and B

We performed MD simulations to determine the glass transition temperatures,  $T_g$ , of polymers A and B, both in bulk and in aggregates under poor solvent conditions. The simulations were carried out at constant temperature and constant pressure  $p = 0$ .

To calculate  $T_g$  in the bulk, we study the specific volume,  $v$ , and the Lennard-Jones energy per bead between non-bonded monomers,  $E_{NB}$ , during cooling, and  $T_g$  is indicated by a change of slope in the temperature dependence of these quantities. The system contained 500 polymer chains with  $N = 23$  beads. The system was initially equilibrated at  $T = 2.0$ , and  $T$  was then lowered every 50,000 MD steps by 0.02 until the final value of  $T$  was reached. From Figure S1, it is clear that both  $v$  and  $E_{NB}$  indicate  $T_{g,A} = 1.3$  for polymer A, and  $T_{g,B} = 0.9$  for polymer B.

To verify that aggregates of polymer A and B undergo glass transition at the same temperatures as in the bulk, we prepared a cubic box with an edge length of  $30\sigma$  which contained an aggregate of 64 polymer chains and 17,820 sol-

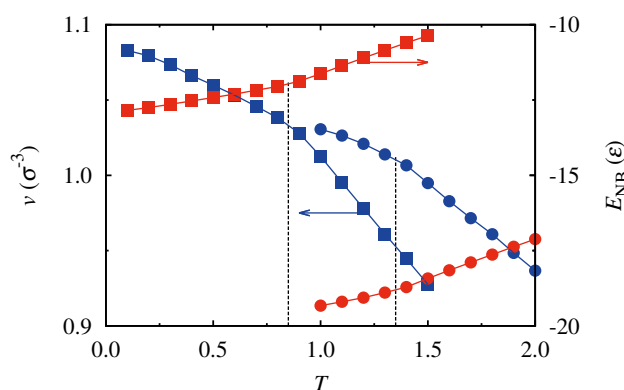

Figure S1: Specific volume,  $v$ , and Lennard-Jones energy per bead between non-bonded monomers,  $E_{NB}$ , of polymers in bulk *vs.* temperature,  $T$ . The circles represent polymer type A, and the squares represent polymer type B. The positions of the kinks indicate that  $T_{g,A} = 1.3$ , and  $T_{g,B} = 0.9$ .

vent particles in poor solvent conditions, *i.e.*,  $\lambda = 0.5$ . Figure S2 shows the Lennard-Jones energy per bead between non-bonded monomers,  $E_{NB}$ , *vs.*  $T$  upon cooling, and a kink can be found at  $T = 1.3$  and  $0.9$  for polymer A and B, respectively.

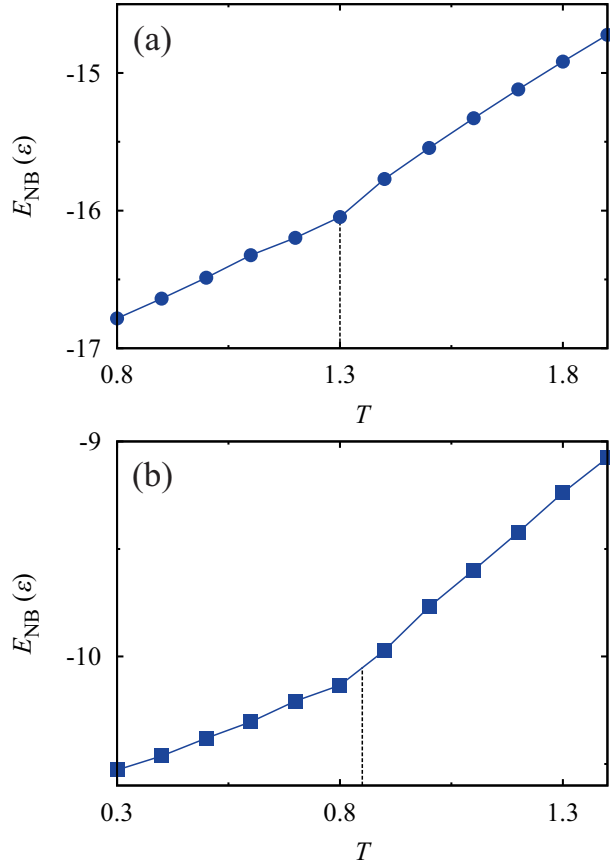

Figure S2: Dependence of Lennard-Jones energy per bead between non-bonded monomers,  $E_{\text{NB}}$ , of an aggregate in poor solvent conditions on temperature,  $T$ , for (a) polymer A and (b) polymer B. The positions of the kinks indicate that  $T_{\text{g,A}} = 1.3$ , and  $T_{\text{g,B}} = 0.9$ .
